# Supplementary material for: Clinical Implications of the NICE 2015 Criteria for Gestational Diabetes Mellitus
Source: MDPI journal article supplement (doi:10.3390/jcm7100376), 2018-10-22
Supplement: s1 [file s1]

## Supplementary Materials

**Table S1.** Breakdown of OGTT results in mmol/L. Colour code: Blue = negative on both criteria; Yellow = IADPSG only; green = positive on NICE criteria. \*As all women were positive on the IADPSG criteria in this study there were no women positive on the 2-hour value alone for NICE.

| Fasting      |         |      | 1-hour |       | 2-hour |         |      | Total      | IADPSG<br>-ONLY | NICE +<br>IADPSG |
|--------------|---------|------|--------|-------|--------|---------|------|------------|-----------------|------------------|
| ≤5.0         | 5.1-5.5 | ≥5.6 | <10.0  | ≥10.0 | <7.7   | 7.8-8.4 | ≥8.5 |            |                 |                  |
| ✓            |         |      | ✓      |       |        |         | ✓    | 9          |                 | 9                |
| ✓            |         |      | ✓      |       |        | ✓       |      | 0*         |                 |                  |
| ✓            |         |      |        | ✓     | ✓      |         |      | 56         | 56              |                  |
| ✓            |         |      |        | ✓     |        | ✓       |      | 4          |                 | 4                |
| ✓            |         |      |        | ✓     |        |         | ✓    | 12         |                 | 12               |
|              | ✓       |      | ✓      |       | ✓      |         |      | 28         | 28              |                  |
|              | ✓       |      | ✓      |       |        | ✓       |      | 1          |                 | 1                |
|              | ✓       |      | ✓      |       |        |         | ✓    | 2          |                 | 2                |
|              | ✓       |      |        | ✓     | ✓      |         |      | 10         | 10              |                  |
|              | ✓       |      |        | ✓     |        | ✓       |      | 1          |                 | 1                |
|              | ✓       |      |        | ✓     |        |         | ✓    | 2          |                 | 2                |
|              |         | ✓    | ✓      |       | ✓      |         |      | 8          |                 | 8                |
|              |         | ✓    | ✓      |       |        | ✓       |      | 1          |                 | 1                |
|              |         | ✓    | ✓      |       |        |         | ✓    | 2          |                 | 2                |
|              |         | ✓    |        | ✓     | ✓      |         |      | 14         |                 | 14               |
|              |         | ✓    |        | ✓     |        | ✓       |      | 4          |                 | 4                |
|              |         | ✓    |        | ✓     |        |         | ✓    | 5          |                 | 5                |
|              |         |      |        |       |        |         |      |            |                 |                  |
| <b>Total</b> |         |      |        |       |        |         |      | <b>159</b> | <b>94</b>       | <b>65</b>        |
